# Supplementary material
Source: PubMed Central journal article supplement (PMC7179637)
Supplement: AAC.02101-19-s0001.pdf [file AAC.02101-19-s0001.pdf]

## 1 **Supplemental Methods**

2 The RPV and DPV genotyping and phenotyping data used in this analysis has been described  
3 previously<sup>1,2</sup>. HIVdb genotypic interpretation algorithms scores in the supplemental material were  
4 determined using the Stanford HIVdb resistance interpretation algorithm version 8.4 (HIVdb  
5 v8.4)<sup>3</sup> by uploading HIV-1 population genotyping FASTA files into the HIVdb website  
6 (<https://hivdb.stanford.edu/hivdb/by-sequences/>). In Supplemental Figure 1, we used the RPV  
7 conventional biological cutoff (BCO) of 2.5-fold as previously described<sup>24</sup> for ‘low-intermediate  
8 resistance’ and >10 fold as ‘high level resistance’ for comparison to HIVdb v8.4. These cutoff  
9 values are not based on clinical data, as with etravirine, because these data are unavailable. In  
10 Supplemental Figure 2A and B we reanalyzed our genotyping ETR weight using the Tibotec  
11 system<sup>4</sup> and compared it to the HIVdb v8.4 (Supplemental Figure 3) using Pearson’s correlation  
12 coefficient calculated with Graph pad Prism version 7. To validate our findings on the association  
13 between ETR resistance and the K65R mutation, we accessed a genotypic and phenotypic dataset  
14 previously published by Melikian et al. 2012<sup>5</sup> accessed through the Stanford RT Phenotype Query  
15 (Supplemental Table 4A). In addition, there was no significant association between these NRTI  
16 mutations and RPV or DPV resistance (Supplemental Figure 3B)<sup>1,2</sup>.

17

18

19

20

21

22

23

24

## 25 Supplemental References

- 26 1. Penrose, K. J. *et al.* Frequent Cross-Resistance to Dapivirine in HIV-1 Subtype C-Infected  
27 Individuals on Failing First-Line Antiretroviral Therapy in South Africa. *Antimicrob. Agents*  
28 *Chemother.* AAC.01805-16 (2016). doi:10.1128/AAC.01805-16
- 29 2. Penrose, K. J. *et al.* Frequent cross-resistance to rilpivirine among subtype C HIV-1 from first-line  
30 antiretroviral therapy failures in South Africa. *Antivir. Chem. Chemother.* **26**, 204020661876298  
31 (2018).
- 32 3. Liu, T. F. & Shafer, R. W. Web Resources for HIV Type 1 Genotypic-Resistance Test  
33 Interpretation. *Clin. Infect. Dis.* **42**, 1608–1618 (2006).
- 34 4. Vingerhoets, J. *et al.* Tibotec Etravirine Weighted Genotype Score to Predict Responsetle. in *XVII*  
35 *HIV Drug Resistance Workshop* (2008).
- 36 5. Melikian, G. L. *et al.* Standardized Comparison of the Relative Impacts of HIV-1 Reverse  
37 Transcriptase (RT) Mutations on Nucleoside RT Inhibitor Susceptibility. *Antimicrob. Agents*  
38 *Chemother.* **56**, 2305–2313 (2012).

39

40

41

42

43

44

45

46

47

48

49

50 **Supplemental Figures and Tables**

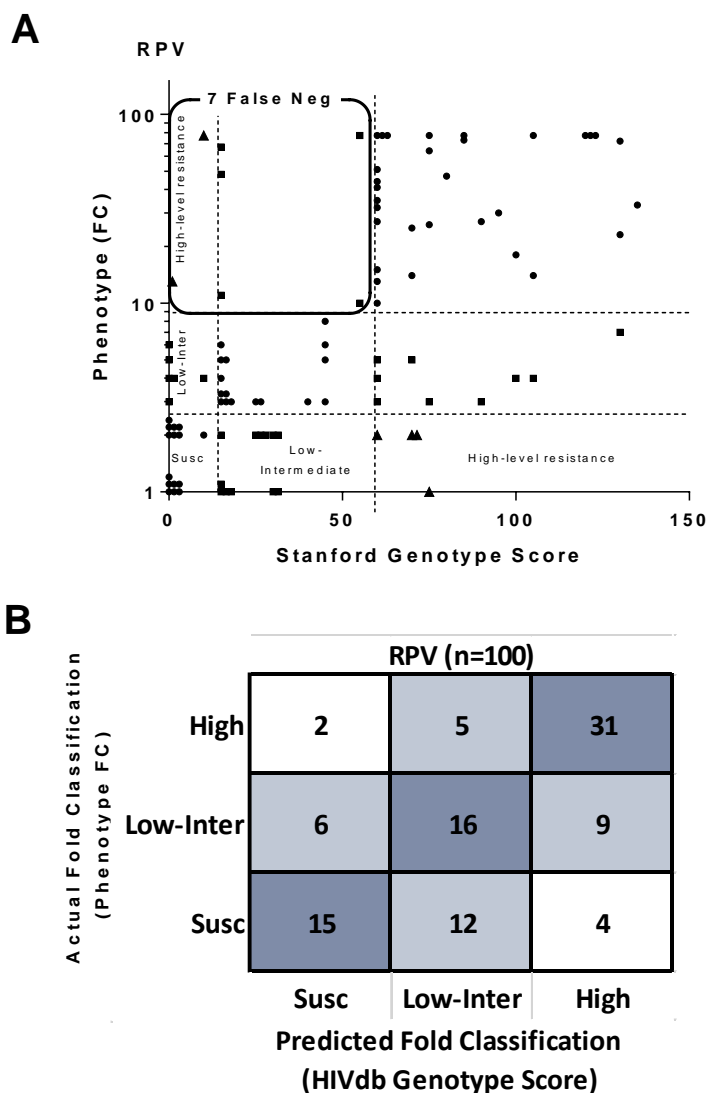

51  
 52 **Supplemental Figure 1. RPV genotypic interpretation algorithm scores accurately predicted**  
 53 **the RPV phenotypic resistance in HIV-1 subtype C isolates.** (A) RPV genotypic interpretation  
 54 algorithm scores more accurately predicted the phenotype as 62% of samples were completely  
 55 concordant (●) and only 32 were partially concordant (■). (B) Error matrixes of actual fold  
 56 phenotypic resistance vs predicted resistance for RPV. Few samples with high phenotypic RPV  
 57 resistance (FC >10) were misclassified as having low or intermediate resistance misclassified

58 samples (7/100). Genotypic interpretation algorithm scores were determined using the Stanford  
59 HIVdb v8.4.

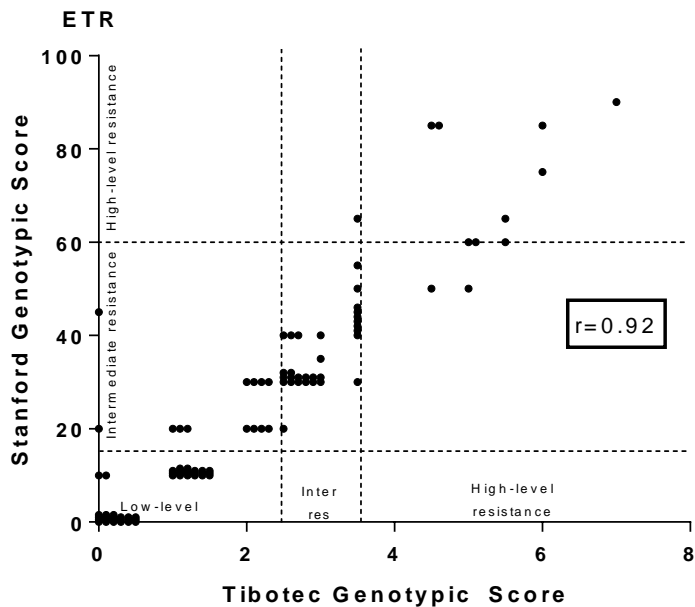

60  
61 **Supplemental Figure 2 Tibotec weighted scores significantly correlated with the HIVdb v8.4**  
62 **( $r=0.92$ ) in HIV-1 subtype C isolates.**

63

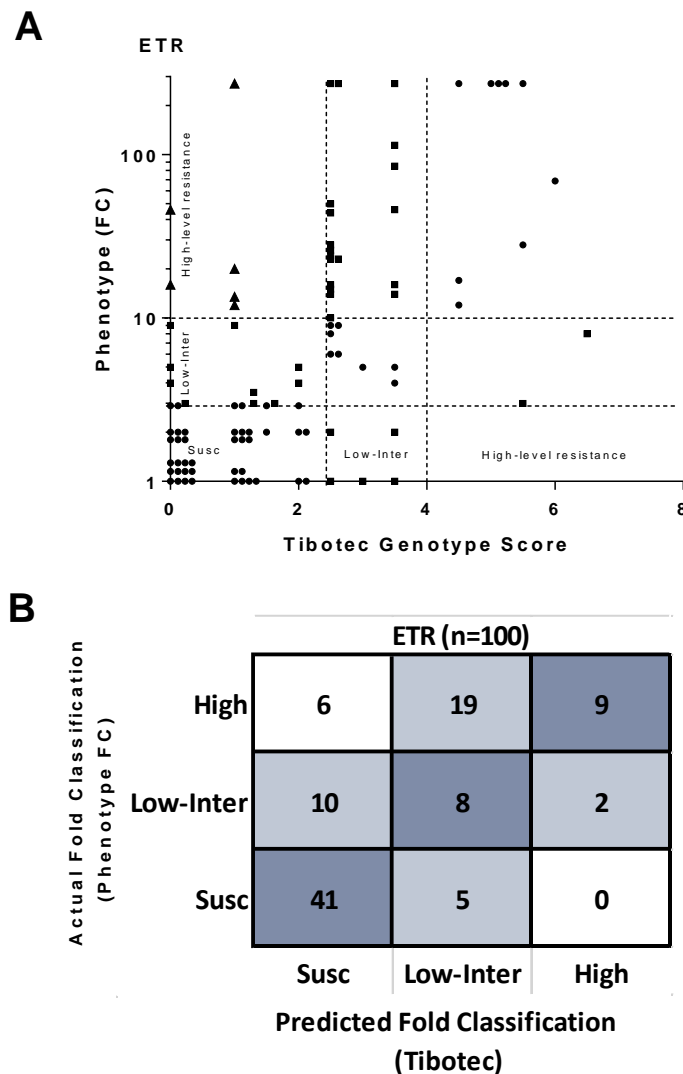

64

65 **Supplemental Figure 3. The ETR phenotype and Tibotec weighted genotype scores are**  
 66 **discordant in HIV-1 subtype C isolates** (A) ETR Phenotype (Fold-Change in IC50) does not  
 67 strongly correlate with Tibotec score ( $r=0.45$ ) for HIV-1 subtype C isolates. 58% of genotype  
 68 scores were concordant (●; classifications matched), 36% partially discordant (■; Tibotec  
 69 predicted 1 classification different) and 6% completely discordant (▲; Tibotec predicted 2  
 70 classifications different) relative to the phenotype clinical cut-offs. (B) Error matrixes of actual

71 fold phenotypic resistance vs Tibotec predicted resistance for ETR. Tibotec failed to predict the  
 72 ETR phenotype resistance in 42%.

73

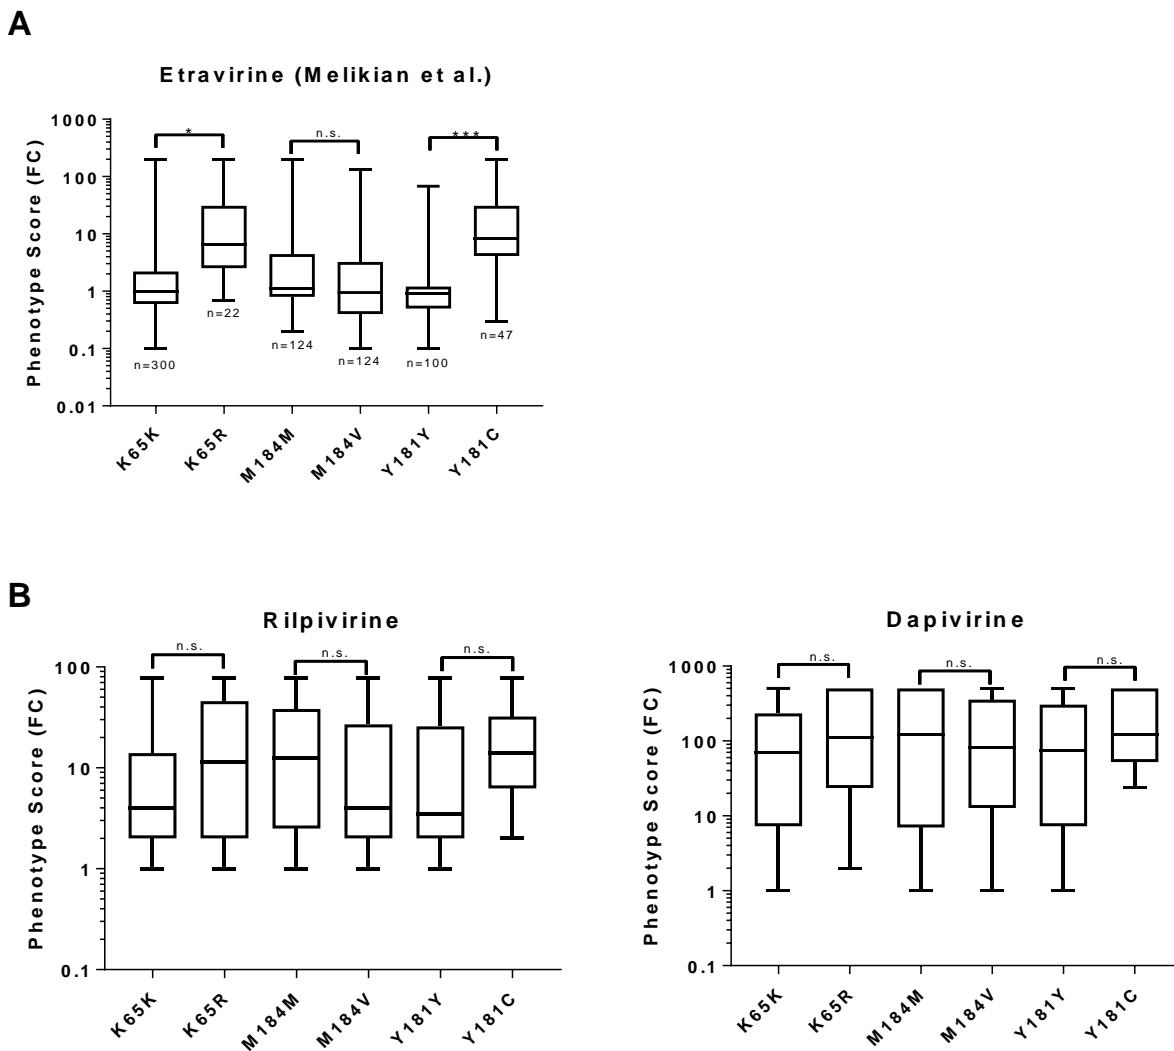

74

75 **Supplemental Figure 4. K65R is associated with ETR resistance, but not ETR NNRTI**

76 **analogs such as RPV and DPV (A) K65R was associated with higher ETR phenotypic resistance**

77 **in a previously published dataset (Melikian et al. 2012) obtained from the Stanford RT Phenotype**

78 **Query. \*p<0.05, \*\*\*p<0.005. (B) Fold-change in Rilpivirine (RPV) or Dapivirine (DPV)**

79 **phenotype resistance was evaluated based on the presence or absence of K65R, M184V or Y181C.**

80 *n.s.* = “no significant difference using Fisher’s Exact”. There was no significant association  
 81 between viruses in our dataset containing K65R and phenotypic resistance to RPV or DPV.

82 **Supplemental Table 1. ETR susceptibility in recombinant HIV-1 virus clones containing**  
 83 **K65R or reversion to 65K.**

| Sample    | Sample Type          | ETR<br>IC50 (nM) | Mutations         |                     |                       |
|-----------|----------------------|------------------|-------------------|---------------------|-----------------------|
|           |                      |                  | NRTI              | NNRTI               | Other                 |
| Wild-type | Batch                | 1.2              | None              | None                | none                  |
| Sample 1  | Batch                | 17.5             | M41L, K65R, M184V | V106M, E138A, V179D | T39DE, K103KR, I135IL |
|           | Single 65R clone 1   | 2.0              | M41L, K65R, M184V | V106M, E138A, V179D | T39D, K102R           |
|           | 65R reverted clone 1 | 1.9              | M41L, M184V       | V106M, E138A, V179D | T39D, K102R           |
|           | Single K65R clone 2  | 74.8             | M41M, K65R, M184V | V106M, E138A, V179D | T39E, K103R, I135L    |
|           | 65R reverted clone 2 | 76.0             | M41M, M184V       | V106M, E138A, V179D | T39E, K103R, I135L    |
| Sample 2  | Batch                | 29.8             | A62V, K65R, M184I | V106M, V179D, M230L | none                  |
|           | Single clone 1       | 41.7             | A62V, K65R, M184I | V106M, V179D, M230L | none                  |
|           | 65R reverted clone 1 | 58.0             | A62V, M184I       | V106M, V179D, M230L | none                  |

84 **Supplemental Table 2. K65R is associated with the NNRTI mutations V179DFT, Y181CIV**  
 85 **and M230L**

| NNRTI<br>RAMs | K65R<br>n=35<br>(%) | K65K<br>n=77<br>(%) | P Value<br>(Fisher's<br>Exact) | P value<br>summary |
|---------------|---------------------|---------------------|--------------------------------|--------------------|
| V90I          | 3 (9)               | 2 (3)               | 0.1752                         | *n.s.              |
| A98G          | 2 (6)               | 12 (16)             | 0.2188                         | n.s.               |
| L100I         | 7 (20)              | 6 (8)               | 0.1071                         | n.s.               |
| K101EHP       | 5 (14)              | 8 (10)              | 0.5401                         | n.s.               |
| V106I         | 1 (3)               | 1 (1)               | 0.5293                         | n.s.               |
| E138AGKQ      | 5 (14)              | 9 (12)              | 0.7609                         | n.s.               |
| V179DFT       | 9 (26)              | 5 (6)               | 0.0105                         | p<0.05             |
| Y181CIV       | 10 (29)             | 6 (8)               | 0.0070                         | p<0.01             |
| G190SA        | 9 (26)              | 18 (23)             | 0.8143                         | n.s.               |
| M230L         | 8 (23)              | 3 (4)               | 0.0037                         | p<0.01             |

86 \*n.s. = “no significant difference” using Fisher’s Exact

87
